# Supplementary material for: Ultrasound-assisted synthesis of rGO/Sb4O5Cl2/Sb2S3 for a high photo-catalytic rate
Source: Royal Society of Chemistry journal article supplement (doi:10.1039/c9nj05830c), 2020-01-01
Supplement: c9nj05830c1.pdf [file c9nj05830c1.pdf]

Electronic supplementary information (ESI)

**Ultrasound-assisted synthesis rGO/Sb<sub>4</sub>O<sub>5</sub>Cl<sub>2</sub>/Sb<sub>2</sub>S<sub>3</sub> for high photo-catalytic rate**

Linsen Huang, Liangxing Zhang, Deyu Bao, Xiaoqing Jiang, Junhua Li, Xiaosong Sun\*

School of Materials Science and Engineering, Sichuan University.  
No. 29, Wang Jiang Road, Chengdu 610064, PR China.

\* Corresponding author: [sunxs@scu.edu.cn](mailto:sunxs@scu.edu.cn)

The doses of catalysts, the concentrations of dyes and the catalysis procedure durations from the papers already published are listed in Table S1, Ref S1-S5, it can be clearly seen that the dose of as-prepared 30rGO-Sb<sub>4</sub>O<sub>5</sub>Cl<sub>2</sub>-Sb<sub>2</sub>S<sub>3</sub> was the smallest, while the concentration of dye degraded was the highest and the catalysis duration was the shortest. In the present work, the catalyst dose was merely one-tenth of the other reports, and the duration was about one-fifth.

| Reference                                                                                                       | S <sup>1</sup> | S <sup>2</sup> | S <sup>3</sup> | S <sup>4</sup> | S <sup>5</sup> | This work |
|-----------------------------------------------------------------------------------------------------------------|----------------|----------------|----------------|----------------|----------------|-----------|
| g-C <sub>3</sub> N <sub>4</sub> -Sb <sub>4</sub> O <sub>5</sub> Cl <sub>2</sub> -Sb <sub>2</sub> S <sub>3</sub> |                |                | 20             | 1              | 60             | 95.0      |
| Sb <sub>4</sub> O <sub>5</sub> Cl <sub>2</sub> -Sb <sub>2</sub> S <sub>3</sub>                                  |                |                | 15             | 1              | 60             | 82.9      |
| Carbon-Sb <sub>2</sub> S <sub>3</sub>                                                                           |                |                | 10             | 1              | 90             | 98.0      |
| 30rGO-Sb <sub>4</sub> O <sub>5</sub> Cl <sub>2</sub> -Sb <sub>2</sub> S <sub>3</sub>                            |                |                | 20             | 0.1            | 16             | 87.4      |

**Table S1** The comparisons of different photo-catalysts for MO dye degradation under visible-light irradiation.

## References

- S1 F. Li, L. Zhang, C. Hu, X. Xing, B. Yan, Y. Gao and L. Zhou, *Applied Catalysis B: Environmental*, 2019, **240**, 132-140.
- S2 H. Wang, X. Yuan, H. Wang, X. Chen, Z. Wu, L. Jiang, W. Xiong and G. Zeng, *Applied Catalysis B: Environmental*, 2016, **193**, 36-46.
- S3 Y. Liu, X. Yuan, H. Wang, X. Chen, S. Gu, Q. Jiang, Z. Wu, L. Jiang, Y. Wu and G. Zeng, *Catalysis Communications*, 2015, **70**, 17-20.
- S4 Q. Jiang, X. Yuan, H. Wang, X. Chen, S. Gu, Y. Liu, Z. Wu and G. Zeng, *RSC Advances*, 2015, **5**, 53019-53024.
- S5 J. Tang, J. Li, Y. Cheng, P. Huang and Q. Deng, *Vacuum*, 2015, **120**, 96-100.
